# Supplementary material for: Achieving quantitative reproducibility in label-free multisite DIA experiments through multirun alignment
Source: PubMed Central journal article supplement (PMC10616189; doi:10.1038/s42003-023-05437-2), 2023-10-30
Supplement: 42003_2023_5437_MOESM2_ESM.pdf [file 42003_2023_5437_MOESM2_ESM.pdf]

## Description of Additional Supplementary Files

**File name:** Supplemental Data

**Description:** Numerical data for figures.
